1 **Novel locus influencing retinal venular tortuosity is also associated with risk of**  
2 **coronary artery disease**

3 Abirami Veluchamy<sup>1</sup>, Lucia Ballerini<sup>2, 6</sup>, Veronique Vitart<sup>3</sup>, Katharina E Schraut<sup>4, 5</sup>, Mirna  
4 Kirin<sup>4,9</sup>, Harry Campbell<sup>4</sup>, Peter K Joshi<sup>4</sup>, Devanjali Relan<sup>6</sup>, Sarah Harris<sup>8,10</sup>, Ellie Brown<sup>12</sup>,  
5 Suraj K Vaidya<sup>12</sup>, Bal Dhillon<sup>6</sup>, Kaixin Zhou<sup>1</sup>, Ewan R Pearson<sup>1</sup>, Caroline Hayward<sup>3</sup>, Ozren  
6 Polasek<sup>4,9</sup>, Ian J Deary<sup>7,8</sup>, Thomas MacGillivray<sup>6,11,12</sup>, James F Wilson<sup>3,4</sup>, Emanuele Trucco<sup>2</sup>,  
7 Colin NA Palmer<sup>1\*&</sup>, Alexander S F Doney<sup>1\*&</sup>

8  
9 <sup>1</sup> Division of Molecular & Clinical Medicine, Ninewells Hospital and Medical School, University of  
10 Dundee, Dundee, Scotland, United Kingdom.

11 <sup>2</sup>VAMPIRE project, Computer Vision and Image Processing Group, School of Science and Engineering  
12 (Computing), University of Dundee, Dundee, Scotland, United Kingdom.

13 <sup>3</sup> MRC Human Genetics Unit, MRC Institute of Genetics and Molecular Medicine, University of  
14 Edinburgh, Edinburgh, Scotland, United Kingdom.

15 <sup>4</sup> Centre for Global Health Research, Usher Institute of Population Health Sciences and Informatics,  
16 University of Edinburgh, Edinburgh, Scotland, United Kingdom.

17 <sup>5</sup> Centre for Cardiovascular Science, Queen's Medical Research Institute, University of Edinburgh,  
18 Edinburgh, Scotland, United Kingdom.

19 <sup>6</sup> VAMPIRE project, Centre for Clinical Brain Sciences, Royal Infirmary of Edinburgh, Edinburgh,  
20 Scotland, United Kingdom.

21 <sup>7</sup> Psychology, University of Edinburgh, Edinburgh, United Kingdom.

22 <sup>8</sup> Centre for Cognitive Ageing and Cognitive Epidemiology, University of Edinburgh, Edinburgh,  
23 United Kingdom.

24 <sup>9</sup> Department of Public Health, School of Medicine, University of Split, Split, Croatia.

25 <sup>10</sup> Medical Genetics Section, Centre for Genomic and Experimental Medicine and MRC Institute of  
26 Genetics and Molecular Medicine, University of Edinburgh, Edinburgh, Scotland, United Kingdom.

27 <sup>11</sup> Edinburgh Clinical Research Facility, Western General Hospital, University of Edinburgh, Edinburgh,  
28 Scotland, United Kingdom.

29 <sup>12</sup> Clinical Research Imaging Centre, Queen's Medical Research Institute, University of Edinburgh,  
30 Edinburgh, Scotland, United Kingdom.

31

32 & These authors contributed equally to this work.

33 \* Correspondence authors

34 [c.n.a.palmer@dundee.ac.uk](mailto:c.n.a.palmer@dundee.ac.uk) (CNAP), [a.doney@dundee.ac.uk](mailto:a.doney@dundee.ac.uk) (ASFD)

## 35 **Abstract**

36 Structural variation in retinal blood vessels is associated with global vascular health in  
37 humans and may provide a readily accessible indicator of several diseases of vascular origin.  
38 Increasing evidence suggests variation in retinal vasculature is highly heritable. This study  
39 aimed to identify genetic determinants of retinal vascular traits. We reported a meta-analysis  
40 of genome-wide association studies (GWAS) for quantitative retinal vascular traits derived  
41 using semi-automatic image analysis of digital retinal photographs from the Genetics of  
42 Diabetes Audit and Research in Tayside (GoDARTS) (n=1736) and the Orkney Complex  
43 Disease Study (ORCADES) (n=1358) cohorts. We identified a novel genome-wide  
44 significant locus at 19q13 (*ACTN4/CAPN12*) for retinal venular tortuosity (*TortV*), and one at  
45 13q34 (*COL4A2*) for retinal arteriolar tortuosity (*TortA*); these two loci were subsequently  
46 confirmed in three independent cohorts (n=1413). In the combined analysis in  
47 *ACTN4/CAPN12* the lead single nucleotide polymorphism (SNP) was rs1808382 (n=4507;  
48 Beta=-0.109; standard error (SE) =0.015; P=2.39×10<sup>-13</sup>) and in *COL4A2* it was rs7991229  
49 (n=4507; Beta=0.103; SE=0.015; P=4.66×10<sup>-12</sup>). Notably, the *ACTN4/CAPN12* locus  
50 associated with retinal *TortV* is also associated with coronary artery disease and heart rate.  
51 Our findings demonstrate the contribution of genetics in retinal tortuosity traits, and provide  
52 new insights into cardiovascular diseases.

## 53 **Author Summary**

54 Retinal vascular features are associated with wide range of diseases related to vascular health  
55 and provide an opportunity to understand early structural changes in vasculature which may  
56 help to predict disease risk. Emerging evidence indicates that retinal tortuosity traits are both  
57 associated with vascular health and highly heritable. However, the genetic architecture of  
58 retinal vascular tortuosity has not been investigated. We therefore performed a genome-wide

59 association study on retinal arteriolar tortuosity (*TortA*) and retinal venular tortuosity trait  
60 (*TortV*) using data from two independent discovery cohorts of 3094 individuals of European-  
61 heritage. We found a novel associations at 19q13 (*ACTN4/CAPN12*) for *TortV*, and one at  
62 13q34 (*COL4A2*) for *TortA* at discovery stage and validated in three independent cohorts. A  
63 significant association was subsequently found between lead SNPs at 19q13 and coronary  
64 artery disease, cardiovascular vascular risk factors and heart rate. We also performed  
65 genome-wide association studies for retinal vascular calibres and optic disc radius  
66 (*ODradius*) and replicated previously reported locus at 10q21.3 for *ODradius*. Our findings  
67 highlight genetic impacts on retinal venular tortuosity and it is association with  
68 cardiovascular disease. This may provide a molecular pathophysiological foundation for use  
69 of retinal vascular traits as biomarkers for cardiovascular diseases.

## 70 **Introduction**

71 Retinal vascular traits can be readily measured non-invasively from fundus images  
72 and changes in these traits have been linked to a number of clinical conditions associated  
73 with vascular health including cardiovascular disease[1,2], stroke[3], hypertension[4], and  
74 neurodegenerative disease[5]. The association between retinal vascular calibers and  
75 cardiovascular disease has been reported in numerous studies and structural variation in  
76 retinal vasculature could predict cardiovascular risk[6–8]. More recently deep learning  
77 applied to retinal images has been successfully used to predict cardiovascular risk factors and  
78 outcomes[9].

79 Increasing evidence has shown a significant genetic component to variation in retinal  
80 blood vascular traits[10,11]. Understanding the molecular genetic architecture of retinal  
81 vascular features provides a molecular pathophysiological basis linking retinal microvascular  
82 features with systemic vascular pathology. Recent genome-wide association studies (GWAS)

83 found number of loci for widely investigated retinal traits including central retinal vein  
84 equivalent (*CRVE*)[12–14], retinal arteriolar equivalent (*CRAE*)[12–14], and optic disc  
85 morphology[15]. Evidence suggests retinal vascular tortuosity, another potentially important  
86 vascular parameter, is also associated with a range of cardiovascular risk factors[16,17].  
87 Heritability estimates for retinal arterial tortuosity range from 50-82% and 21% for retinal  
88 venular tortuosity[18,19], indicating a substantial genetic contribution to the variation in  
89 these parameters.

90 To our knowledge, no studies have performed genome-wide scan on retinal vascular  
91 tortuosity traits. We therefore carried out a discovery stage GWAS analysis using two  
92 independent cohorts including the Genetics of Diabetes Audit and Research in Tayside Study  
93 (GoDARTS) and the Orkney Complex Disease Study (ORCADES) to examine the  
94 underlying genetic factors influencing the retinal vascular tortuosity traits derived from  
95 digital retinal photographs; arteriolar tortuosity (*TortA*), maximum *TortA* (*TortAmax*),  
96 venular tortuosity (*TortV*), and maximum *TortV* (*TortVmax*). We also conducted a GWAS of  
97 other previously investigated retinal vascular traits including *CRAE*, *CRVE*, Arteriole-to-  
98 Venule ratio (*AVR*), as well as Optic Disc radius (*ODradius*). We confirmed our findings for  
99 retinal tortuosity traits in three independent replication cohorts (Lothian Birth Cohort 1936  
100 (LBC1936), CROATIA- Korčula, and CROATIA-Split). Moreover, we examined the  
101 relationship between these sentinel SNPs and cardiovascular risk factors using data from the  
102 Coronary Artery Disease Genome wide Replication and meta-analysis plus The Coronary  
103 Artery Disease (CARDIoGRAMplus C4D) consortium meta-analysis[20], Global Lipid  
104 Genetics Consortium analysis[21] (GLGC), International consortium for blood pressure  
105 (ICBP) GWAS analysis[22] and on heart rate from the UK Biobank [23].

106

## 107 **Results**

### 108 **Study samples**

109 Two independent discovery cohorts were included; patients with type 2 diabetes from the  
 110 GoDARTS (n=1736) and a population-based sample comprising the ORCADES (n=1358).  
 111 In both these cohorts, traits were measured from retinal fundus images (**S1 Fig.**) using  
 112 VAMPIRE 3.1[24,25] (Vascular Assessment and Measurement Platform for Images of  
 113 Retina), which enables efficient, semi-automatic measurement of the retinal vasculature from  
 114 large numbers of images. The VAMPIRE methodology used in the discovery stage has been  
 115 previously reported. [25–27]. The study design and characteristics of the discovery cohorts  
 116 are shown in **Fig 1.**, and **Table 1.**

117 **Table 1.** Descriptive statistics of variables for discovery study cohorts.

| Traits                         | GoDARTS        | ORCADES        |
|--------------------------------|----------------|----------------|
| Sample size                    | 1742           | 1358           |
| Age (yr.)                      | 69.78 ± 9.63   | 52.23 ± 14.7   |
| Male/Female                    | 990/752        | 542/816        |
| <i>lnTortA</i> (mean ± SD)     | -9.76 ± 0.99   | -10.94 ± 1.32  |
| <i>lnTortA</i> max (mean ± SD) | -8.41 ± 0.92   | -9.22 ± 1.17   |
| <i>lnTortV</i> (mean ± SD)     | -10.03 ± 0.78  | -11.52 ± 1.01  |
| <i>lnTortV</i> max (mean ± SD) | -8.66 ± 0.86   | -9.76 ± 0.90   |
| ODradius (mean ± SD)           | 208.56 ± 18.97 | 183.26 ± 19.46 |
| CRAE (mean ± SD)               | 33.11 ± 2.39   | 29.09 ± 2.55   |
| CRVE (mean ± SD)               | 43.74 ± 3.11   | 39.15 ± 3.62   |
| AVR (mean ± SD)                | 0.76 ± 0.05    | 0.75 ± 0.08    |

118 Eight retinal vascular parameters are abbreviated as follows: Natural log transformed – Retinal Arteriolar Tortuosity  
 119 (*lnTortA*), maximum TortA (*lnTortAmax*), Retinal Venular Tortuosity (*lnTortV*), and maximum TortV (*lnTortV*). Optic  
 120 Disc radius (ODradius), Central Retinal Arteriolar Equivalent (CRAE), Arteriole-to-Venule ratio (AVR), Central Retinal  
 121 Venular Equivalent (CRVE), SD – standard deviation. GoDARTS: Genetics of Diabetes Audit and Research in Tayside;  
 122 ORCADES: Orkney Complex Disease Study.

123  
124 In the discovery stage, we performed a GWAS using the GoDARTS cohort for each  
125 retinal trait separately and tested the additive effect of each variant, adjusted for age, gender  
126 and the first three principal components. Similarly, GWAS was performed for the same traits  
127 in the ORCADES cohort, using a mixed model to account for kinship and first three principal  
128 components as covariates correcting for population structure. As there were statistically  
129 significant differences by age, and gender between two discovery cohorts (both age and  
130 gender,  $P < 0.0001$ ) the model was adjusted for these in both discovery cohorts. We combined  
131 the summary results from these two cohorts for each trait using a fixed effect meta-analysis  
132 and the genomic inflation factor is 0.99. **S1 Table** presents the results from the meta-analysis  
133 and independent cohort GWAS analysis. Manhattan plots and regions of interest for  
134 tortuosity traits are shown in **Fig 2-3**. Manhattan plots for other retinal traits and QQ plots for  
135 all traits are shown in, and **S2-S4 Figs**.

136 This analysis revealed one genome-wide significant ( $p < 5 \times 10^{-8}$ ) SNP, rs56399312,  
137 associated with *TortA* at 13q34, in *COL4A2* with moderate heterogeneity ( $I^2 = 0.50$ );  
138 Beta=0.182, SE= 0.032,  $P = 2.70 \times 10^{-8}$ , and another SNP rs9515212 near *COL4A2* that was  
139 just below the threshold for genome-wide significance; Beta=0.151, SE= 0.028,  $P = 8.59 \times 10^{-8}$ .  
140 Conditional analysis on the lead SNP indicated that these are not independent signals (**S2**  
141 **Table**). Two genome-wide significant SNPs were associated with *TortV*, at 19q13 in *ACTN4*  
142 (lead SNP rs1808382; Beta=-0.123, SE= 0.022,  $P = 1.55 \times 10^{-8}$ ; no heterogeneity,  $I^2 = 0.00$ ),  
143 and at 12q24.33 near *TMEM132D* (lead SNP rs73157566; Beta= -0.294, SE= 0.054,  $P = 4.07$   
144  $\times 10^{-8}$ ; low heterogeneity,  $I^2 = 0.10$ ); these associations at both these loci have not been  
145 reported previously with any retinal vascular parameters.

146 Although we replicated previously reported loci for *CRVE*, we did not find any novel  
147 genome-wide significant loci for this trait[12][14]. In addition, we did not replicate any of

148 the previously reported SNPs associated with *CRAE*[13]. Finally, we replicated a previously  
 149 reported genome-wide significant locus for *ODradius* at 10q21.3 near *PBLD/ATOH7* (lead  
 150 SNP rs61854835; Beta= -3.840, SE= 0.575, P=  $4.06 \times 10^{-11}$ ) and confirmed a number of other  
 151 loci for this trait [15,28–30] (**S3 Table**).

152 We selected three lead SNPs near *ACTN4*, *TMEM132D*, and *COL4A2*, that reached  
 153 significance  $P \leq 1.07 \times 10^{-07}$  as well as their effect size and direction being similar across the  
 154 discovery cohorts, as candidates to carry forward for replication, and confirmed these in three  
 155 independent cohorts comprised of up to 1413 individuals of European ancestry including the  
 156 Lothian Birth Cohort 1936[31] (LBC1936), Croatia-Korcula, and Croatia-Split. Retinal  
 157 images from these cohorts had been analyzed by SIVA 3.1[32,33] (Singapore I Vessels  
 158 Assessment) software to quantify the tortuosity traits. The characteristics of the replication  
 159 cohorts have been presented in **Table 2**. Two *TortA*-associated SNPs, rs7991229, and  
 160 rs9515212 in *COL4A2* reached significance ( $P < 0.05$ ) in the LBC1936 and Croatians cohorts  
 161 but lead SNP (rs56399312) did not replicate in the LBC1936. Two *TortV*-associated SNPs,  
 162 rs1808382 and rs3786835 in *ACTN4/CAPN12* reached suggestive significance ( $P < 1 \times 10^{-04}$ ) in  
 163 the combined analysis of replication cohorts whereas rs73157566 near *TMEM132D* did not  
 164 replicate.

165 **Table 2. Descriptive statistics of variables for replication study cohorts.**

| Traits            | LBC1936       | Croatia-Korcula | Croatia-Split |
|-------------------|---------------|-----------------|---------------|
| Sample size       | 644           | 387             | 382           |
| Age (yr.)         | 72.48 ± 0.72  | 54.28 ± 12.51   | 49.1 ± 14.23  |
| Male/Female       | 334/310       | 122/265         | 154/228       |
| TortA (mean ± SD) | -9.62 ± 0.235 | -9.55 ± 0.26    | -9.66 ± 0.25  |
| TortV (mean ± SD) | -9.51 ± 0.242 | -9.49 ± 0.21    | -9.62 ± 0.22  |

166 Natural log transformed - Retinal Arteriolar Tortuosity (*lnTortA*), maximum TortA (*lnTortAmax*), Retinal  
 167 Venular Tortuosity (*lnTortV*), and maximum TortV (*lnTortV*). SD – standard deviation. LBC1936: Lothian  
 168 Birth Cohorts 1936; All Croatia: Croatia island of Korcula+ Croatia Split.

169

## 170 **Meta-analysis of discovery and replication cohorts**

171 In the overall meta-analysis, only SNPs at 13q34, *COL4A2* (*TortA*) and 19q13,  
172 *ACTN4* (*TortV*) were confirmed at genome-wide significance. Although *TortA* associated  
173 SNPs rs9515212 and rs7991229 were not genome-wide significant in the discovery meta-  
174 analysis, they reached genome-wide significance in the overall meta-analysis and no  
175 heterogeneity ( $I^2=0.00$ ) was observed across different cohorts;  $P_{\text{overall}}=4.66\times 10^{-12}$  and  
176  $P_{\text{overall}}=4.71\times 10^{-12}$ , respectively. Whereas the lead SNP in *COL4A2* for *TortA* (rs56399312) at  
177 discovery stage did not reach genome-wide significance in overall meta-analysis  
178 ( $P_{\text{overall}}=1.95\times 10^{-07}$ ). For *TortV* the lead SNPs, rs1808382 ( $P_{\text{overall}}=2.39\times 10^{-13}$ ) and rs3786835  
179 ( $P_{\text{overall}}=3.31\times 10^{-13}$ ) near *ACTN4/CAPN12*, maintained genome-wide significance with no  
180 heterogeneity ( $I^2=0.00$ ). These SNPs are in tight LD and therefore do not represent  
181 independent signals. **Table 3** contains the summary statistics from replication cohorts and  
182 meta-analysis of these cohorts. Forest plots for lead SNPs in the combined analysis are shown  
183 in **Fig 4**.

## 184 ***TortA*-associated variants**

185 *COL4A2* encodes collagen type IV alpha 2, one of the six subunits of type IV  
186 collagens which are major structural components of basement membranes, forming a thin  
187 sheet of fibers under the endothelium controlling passage of vasoactive substances. These are  
188 conserved across species and C-terminal non-collagenous domains play a role in  
189 angiogenesis[34]. Recent GWAS report that common variants around *COL4A2* and *COL4A1*  
190 (a paralogue immediately proximal to *COL4A2*, with which it shares a promoter and is co-  
191 expressed), are associated with coronary artery calcification[35], arterial stiffness[36], and  
192 coronary artery disease[20,37–39] (CAD).



193 **Table 3. Results of discovery, replication and overall meta-analysis for tortuosity traits**

| SNP                          | Chr           | BP              | Candidate gene               | Effect allele (Freq.) | Cohort                       | BETA          | SE                           | P                            | Het P (I <sup>2</sup> ) |                        |
|------------------------------|---------------|-----------------|------------------------------|-----------------------|------------------------------|---------------|------------------------------|------------------------------|-------------------------|------------------------|
| <i>TortA</i>                 |               |                 |                              |                       |                              |               |                              |                              |                         |                        |
| rs7991229                    | 13            | 111091995       | COL4A2                       | G<br>(0.42)           | GODARTS                      | 0.136         | 0.032                        | 2.30×10 <sup>-05</sup>       | 0.75(0)                 |                        |
|                              |               |                 |                              |                       | ORCADES                      | 0.187         | 0.055                        | 0.000728                     |                         |                        |
|                              |               |                 |                              |                       | <b>Stage 1 meta-analysis</b> | <b>0.098</b>  | <b>0.018</b>                 | <b>1.07×10<sup>-07</sup></b> |                         |                        |
|                              |               |                 |                              |                       | LBC1936                      | 0.029         | 0.014                        | 0.039721                     |                         |                        |
|                              |               |                 |                              |                       | All Croatia                  | 0.037         | 0.009                        | 9.83×10 <sup>-05</sup>       |                         |                        |
| rs9515212                    | 13            | 111087563       | COL4A2                       | G<br>(0.42)           | <b>Stage 2 meta-analysis</b> | <b>0.114</b>  | <b>0.027</b>                 | <b>2.80×10<sup>-05</sup></b> | 0.62(0)                 |                        |
|                              |               |                 |                              |                       | <b>0.103</b>                 | <b>0.015</b>  | <b>4.66×10<sup>-12</sup></b> | 0.65(0)                      |                         |                        |
|                              |               |                 |                              |                       | <b>Combined</b>              | 0.138         | 0.032                        |                              |                         | 1.96×10 <sup>-05</sup> |
|                              |               |                 |                              |                       | GODARTS                      | 0.189         | 0.055                        |                              |                         | 0.000685               |
|                              |               |                 |                              |                       | ORCADES                      | 0.029         | 0.014                        |                              |                         | 0.043685               |
| <b>Stage 1 meta-analysis</b> | <b>0.038</b>  | <b>0.009</b>    | <b>8.40×10<sup>-05</sup></b> | 0.59(0)               |                              |               |                              |                              |                         |                        |
| LBC1936                      | <b>0.114</b>  | <b>0.027</b>    | <b>2.01×10<sup>-05</sup></b> |                       |                              |               |                              |                              |                         |                        |
| All Croatia                  | <b>0.104</b>  | <b>0.015</b>    | <b>4.71×10<sup>-12</sup></b> |                       | 0.85(0)                      |               |                              |                              |                         |                        |
| <b>Stage 2 meta-analysis</b> | 0.186         | 0.037           | 6.67×10 <sup>-07</sup>       |                       |                              |               |                              |                              |                         |                        |
| <b>0.168</b>                 | <b>0.066</b>  | <b>0.010473</b> |                              |                       |                              |               |                              |                              |                         |                        |
| <b>Combined</b>              | <b>0.099</b>  | <b>0.018</b>    | <b>2.70×10<sup>-08</sup></b> | 0.15(0.5)             |                              |               |                              |                              |                         |                        |
| GODARTS                      | 0.025         | 0.018           | 0.17722                      |                       |                              |               |                              |                              |                         |                        |
| ORCADES                      | 0.025         | 0.012           | 0.0386                       |                       |                              |               |                              |                              |                         |                        |
| <b>Stage 1 meta-analysis</b> | <b>0.065</b>  | <b>0.027</b>    | <b>0.0149</b>                |                       | 0.98(0)                      |               |                              |                              |                         |                        |
| LBC1936                      | <b>0.088</b>  | <b>0.015</b>    | <b>1.95×10<sup>-07</sup></b> |                       |                              |               |                              |                              |                         |                        |
| All Croatia                  |               |                 |                              |                       |                              |               |                              |                              |                         |                        |
| <b>Stage 2 meta-analysis</b> |               |                 |                              |                       |                              |               |                              |                              |                         |                        |
| <b>Combined</b>              |               |                 |                              |                       |                              |               |                              |                              |                         |                        |
| <i>TortV</i>                 |               |                 |                              |                       |                              |               |                              |                              |                         |                        |
| rs1808382                    | 19            | 39151034        | ACTN4                        | T<br>(0.475)          | GODARTS                      | -0.125        | 0.026                        | 2.41×10 <sup>-06</sup>       | 0.69(0)                 |                        |
|                              |               |                 |                              |                       | ORCADES                      | -0.116        | 0.039                        | 0.0031218                    |                         |                        |
|                              |               |                 |                              |                       | <b>Stage 1 meta-analysis</b> | <b>-0.101</b> | <b>0.018</b>                 | <b>1.55×10<sup>-08</sup></b> |                         |                        |
|                              |               |                 |                              |                       | LBC1936                      | -0.049        | 0.014                        | 0.00065                      |                         |                        |
|                              |               |                 |                              |                       | All Croatia                  | -0.033        | 0.009                        | 0.00064                      |                         |                        |
| rs3786835                    | 19            | 111087563       | ACTN4                        | A<br>(0.471)          | <b>Stage 2 meta-analysis</b> | <b>-0.129</b> | <b>0.027</b>                 | <b>1.35×10<sup>-06</sup></b> | 0.87(0)                 |                        |
|                              |               |                 |                              |                       | <b>-0.109</b>                | <b>0.015</b>  | <b>2.39×10<sup>-13</sup></b> | 0.61(0)                      |                         |                        |
|                              |               |                 |                              |                       | <b>Combined</b>              | -0.126        | 0.026                        |                              |                         | 1.95×10 <sup>-06</sup> |
|                              |               |                 |                              |                       | GODARTS                      | -0.109        | 0.039                        |                              |                         | 0.004924               |
|                              |               |                 |                              |                       | ORCADES                      | -0.049        | 0.014                        |                              |                         | 0.000537               |
| <b>Stage 1 meta-analysis</b> | <b>-0.033</b> | <b>0.009</b>    | <b>0.0006</b>                | 0.87(0)               |                              |               |                              |                              |                         |                        |
| LBC1936                      | <b>-0.130</b> | <b>0.027</b>    | <b>1.10×10<sup>-06</sup></b> |                       |                              |               |                              |                              |                         |                        |
| All Croatia                  | <b>-0.109</b> | <b>0.015</b>    | <b>3.31×10<sup>-13</sup></b> |                       | 0.53(0)                      |               |                              |                              |                         |                        |
| <b>Stage 2 meta-analysis</b> | -0.289        | 0.061           | 3.28×10 <sup>-06</sup>       |                       |                              |               |                              |                              |                         |                        |
| <b>-0.314</b>                | <b>0.113</b>  | <b>0.005458</b> |                              |                       |                              |               |                              |                              |                         |                        |
| <b>Combined</b>              | <b>-0.097</b> | <b>0.018</b>    | <b>4.07×10<sup>-08</sup></b> | 0.28(0.1)             |                              |               |                              |                              |                         |                        |
| GODARTS                      | -0.061        | 0.045           | 0.17165                      |                       |                              |               |                              |                              |                         |                        |
| ORCADES                      |               |                 |                              |                       |                              |               |                              |                              |                         |                        |
| <b>Stage 1 meta-analysis</b> |               |                 |                              |                       |                              |               |                              |                              |                         |                        |
| <b>Combined</b>              |               |                 |                              |                       |                              |               |                              |                              |                         |                        |
| rs7315756<br>6               | 12            | 129533847       | TMEM132D                     | A<br>(0.043)          | <b>Stage 2 meta-analysis</b> | <b>-0.289</b> | <b>0.061</b>                 | <b>3.28×10<sup>-06</sup></b> | 0.28(0.1)               |                        |
|                              |               |                 |                              |                       | <b>-0.314</b>                | <b>0.113</b>  | <b>0.005458</b>              |                              |                         |                        |
|                              |               |                 |                              |                       | <b>Combined</b>              | <b>-0.097</b> | <b>0.018</b>                 | <b>4.07×10<sup>-08</sup></b> |                         |                        |
|                              |               |                 |                              |                       | GODARTS                      | -0.061        | 0.045                        | 0.17165                      |                         |                        |
|                              |               |                 |                              |                       | ORCADES                      |               |                              |                              |                         |                        |

|                              |               |              |                              |           |
|------------------------------|---------------|--------------|------------------------------|-----------|
| GODARTS                      | -0.003        | 0.029        | 0.9045                       |           |
| ORCADES                      | <b>-0.027</b> | <b>0.027</b> | 0.30795                      | 0.35(0)   |
| <b>Stage 1 meta-analysis</b> | <b>-0.075</b> | <b>0.015</b> | <b>2.61×10<sup>-06</sup></b> | 0.08(0.6) |
| LBC1936                      |               |              |                              |           |
| All Croatia                  |               |              |                              |           |
| <b>Stage 2 meta-analysis</b> |               |              |                              |           |
| <b>Combined</b>              |               |              |                              |           |

194 GODARTS: Genetics of Diabetes Audit and Research in Tayside; ORCADES: Orkney Complex Disease Study; LBC1936:  
195 thian Birth Cohorts 1936; All Croatia: Croatia island of Korcula+ Croatia Split. Natural log transformed - TortA retinal  
196 arteriolar tortuosity, TortV retinal venular tortuosity. Standardized beta estimate (Cohen's d) and SE\_beta values are in bold  
197 text. Beta: Change in natural log transformed retinal tortuosity traits for each copy of the effect allele; SE: standard error; het  
198 heterogeneity I<sup>2</sup> index; Het P, P value for heterogeneity. Base position is based on build 37 of the reference genome.

199            Interestingly, gene expression data from GeneAtlas[40], a human protein-coding  
200 transcriptome study validated the high expression of *COL4A2* in retinal micro-vessel  
201 endothelial cells (**S5 Fig.**) whereas *COL4A1* is weakly expressed in retina indicating a  
202 specific role of *COL4A2* in the retinal vasculature. *TortA*-associated variants near *COL4A2*  
203 significantly alter transcription factor binding motifs and have putative effects on  
204 transcription as annotated by ENCODE (**S4 Table**). Additionally, expression data from the  
205 GTEx database[41] confirmed that these significant SNPs, are associated with the expression  
206 of *COL4A2* in heart left ventricle and artery aorta, shown in **S5 Table, S6 Fig.**, and these  
207 SNPs are in linkage disequilibrium (LD; r<sup>2</sup>=0.99, D'=1).

208            Lead SNPs associated with *TortA* remained significant after conditioning on the  
209 previously reported cardiovascular risk variants in *COL4A2* (rs11617955[20],  
210 rs4773144[38], rs9515203[39]) (**S7 Fig., S6 Table**). Conversely the lead SNPs for *TortA*  
211 were not associated with coronary artery disease (CAD) and myocardial infarction (MI) risk  
212 in the CARDIOGRAMplus C4D consortium meta-analysis[20] (**S7 Table**). Finally, the CAD  
213 associated variants specifically in *COL4A1* from the CARDIOGRAMplusC4D were not  
214 associated with *TortA*, whereas CAD associated *COL4A2* variants are only weakly associated  
215 with *TortA* (**S7-S8 Table**). Retinal vascular tortuosity traits have been previously associated  
216 with blood pressure[17,19] which may be therefore link these variants with CAD, however,

217 we found no evidence for an association between these lead variants and blood pressure in  
218 the ICBP GWAS analysis[22] (**S9 Table**).

### 219 ***TortV*-associated variants**

220 *ACTN4* encodes alpha-actinin 4, a cross-linking protein belonging to the spectrin  
221 superfamily and mutations in this gene cause focal segmental glomerulosclerosis in humans.  
222 *ACTN2*, a homolog of *ACTN4*, interacts with *ACTN4* and missense mutations in *ACTN2* are  
223 linked to a range of cardiac diseases[42]. Annotation by ENCODE[43] indicates that the two  
224 genome-wide significant variants (rs1808382, rs3786835) associated with *TortV* near *ACTN4*  
225 may have direct regulatory effects as they are located within a DNase I hypersensitivity site  
226 and in genomic regions enriched for promoter/enhancer histone marks in heart tissues (**S5**  
227 **Table**). *ACTN4* and *CAPN12* (calcium-activated neural proteases) overlap by 339 bases at  
228 their 3' ends and multi-tissue expression quantitative trait loci (eQTL) analysis confirms that  
229 these SNPs in *ACTN4* are associated with mRNA expression of both *ACTN4* and *CAPN12* in  
230 aorta, tibial artery, atrial appendage and left ventricle of the heart (**S5 Table, S8 Fig**).  
231 Additionally, this analysis indicates that the T allele at rs1808382 is correlated with lower  
232 *ACTN4* (artery aorta;  $P=2.1 \times 10^{-03}$ ) and this correlation is even stronger with *CAPN12* (artery  
233 aorta;  $P=2.0 \times 10^{-07}$ ). However, while gene expression data using GENEINVESTIGATOR  
234 validated the high expression of *ACTN4* in arterial tissue, the highest expression of *CAPN12*  
235 appears to be in the hematopoietic system (**S5 Fig**).

236 Lead SNPs in *ACTN4* were significantly associated with coronary artery disease in the  
237 CARDIoGRAMplus C4D consortium meta-analysis[20] (**S7 Table**) and were associated with  
238 CAD risk factors; HDL cholesterol and triglycerides in the GLGC[21], but not associated  
239 with blood pressure in the ICBP GWAS analysis[22] (**S9 Table**). Furthermore, we have  
240 confirmed the association between *TortV* and top variants in *ACTN4/CAPN12* in a sensitivity

241 analysis that only included GoDARTS samples without any cardiovascular events prior to the  
242 retinal screening date (**S10 Table**). Moreover, recent meta-analysis of 35 GWAS studies  
243 reported the association of SNP (rs11083475) in the *ACTN4* locus with increased resting  
244 heart rate[44] which may increase cardiovascular disease risk. This signal is the same as that  
245 for *TortV* with strong LD being observed between the lead SNPs for *TortV* and the index SNP  
246 for heart rate. Furthermore we found that these SNPs were associated with heart rate in UK  
247 Biobank[23] (**S11 Table, S9 Fig.**).

## 248 **Discussion**

249 In this first GWAS for quantitative retinal vascular tortuosity traits, we found novel  
250 loci for retinal arteriolar tortuosity (*COL4A2*) and for retinal venular tortuosity  
251 (*ACTN4/CAPN12*), which were replicated in three independent cohorts. Our findings are  
252 consistent, non-heterogeneous and have the same direction of effects across all five fairly  
253 homogeneous cohorts of European ancestry comprising individuals with and without  
254 diabetes, and irrespective of the measurement platform used. Notably, we also identified a  
255 genome-wide significant signal at a previously reported locus in/near *ATOH7/PBLD* for the  
256 optic disc radius and replicated previously identified variants for *CRVE* which validate our  
257 retinal traits measurement methods. Together these aspects strongly support the robustness  
258 our study design and findings. Power calculations indicated that a sample size of 4507 (stage  
259 1 and stage 2), and 3094 (stage 1) and the effect size of 0.10 using Bonferroni correction  
260 ( $P < 5 \times 10^{-8}$ ) was adequate to provide 80% statistical power to detect the associations.

261 Previous studies have reported the association between *COL4A2* and CAD but the  
262 *TortA*-associated variants in *COL4A2* in the present study are not associated with  
263 cardiovascular disease and similarly *COL4A2* variants that are associated with CAD do not  
264 appear to be associated with arteriolar tortuosity suggesting that variants in this gene complex

265 may be involved differentially in the pathophysiology of microvascular and macrovascular  
266 diseases. However, more work has to be done to determine the distinct role of genetic  
267 variants in *COL4A2/COL4A1* in different clinical conditions. In contrast, we found that  
268 retinal venular tortuosity-associated variants were associated with coronary artery disease as  
269 well as heart rate. Furthermore, the lead variant influences the expression of the  
270 *ACTN4/CAPN12* genes in the heart tissue. Our sensitivity analyses including samples without  
271 CAD prior to the date of acquisition of the measured retinal image indicates that relationship  
272 between genetic predictors of retinal venular tortuosity and cardiovascular diseases is not due  
273 to reverse causation and demonstrate the robustness of our findings.

274 Evidence suggests that both retinal arteriolar and venular tortuosity traits are  
275 associated with blood pressure and cardiovascular risk factors[17]. However, a recent study  
276 from the ORCADES and Croatia-Korcula cohorts reported very weak association between  
277 retinal arteriolar tortuosity and blood pressure whereas no evident association between retinal  
278 venular tortuosity traits and blood pressure[19]. In this regard, neither the *TortA* nor *TortV*-  
279 associated variants were associated with systolic and diastolic blood pressure in the ICBP  
280 GWAS analysis thus it seems unlikely that observed associations with CAD or related traits  
281 are mediated through blood pressure.

282 In summary, this first GWAS for retinal arteriolar and venular tortuosity reveals SNPs  
283 influencing expression of *COL4A2* and *ACTN4/CAPN12* respectively. Our results  
284 demonstrate that the *TortA*-associated variants in *COL4A2* are independent of CAD, MI, and  
285 blood pressure, and point to a selective role of *COL4A2* rather than *COL4A1* in the retinal  
286 vessels. Strikingly, we found *TortV*-associated *ACTN4/CAPN12* SNPs are associated with  
287 CAD and heart rate but not associated with blood pressure. However, detailed investigation  
288 and functional validation of this new finding is essential to elucidate the causal roles of  
289 *ACTN4* and/or *CAPN12* in the observed cardiovascular pathophysiology. These findings

290 highlight the potential genetic impacts of retinal vasculature to provide new insights into  
291 cardiovascular disease.

## 292 **Materials and Methods**

### 293 **Study participants**

#### 294 **Discovery Cohorts**

295 Participants in the discovery phase of this study were obtained from the two independent  
296 cohorts, the GoDARTS [45] and the ORCADES. GoDARTS comprises individuals of  
297 European-heritage from Tayside, Scotland who provided a sample of blood for genetic  
298 analysis and consent to link their genetic information to the anonymized electronic health  
299 records. Approval for recruitment to GoDARTS was obtained from the Tayside Committee  
300 on Medical Research Ethics. 18,190 individuals were recruited with approximately half  
301 having type 2 diabetes at the time of recruitment with the other half being diabetes free. 7,290  
302 individuals currently have genome-wide data for analysis. ORCADES is a family-based study  
303 of 2078 individuals aged 16-100 years recruited between 2005 and 2011 in the isolated  
304 Scottish archipelago of Orkney[46]. Genetic diversity in this population is decreased  
305 compared to Mainland Scotland, consistent with the high levels of endogamy historically.  
306 Fasting blood samples were collected and over 300 health-related phenotypes and  
307 environmental exposures were measured in each individual. All participants provided written  
308 informed consent and the study was approved by Research Ethics Committees in Orkney and  
309 Aberdeen.

#### 310 **Replication Cohorts**

311 The LBC1936 comprises 1091 participants who were born in 1936, most of whom took part  
312 in the Scottish Mental Survey of 1947. At a mean age of 69.5 years (SD 0.8), between 2004  
313 and 2007, they were recruited to a study to determine influences on cognitive aging[31]. The

314 CROATIA- Korčula study comprises individuals from the Adriatic island of Korčula,  
315 between the ages of 18 and 88. The fieldwork was performed in 2007 in the eastern part of  
316 the island, targeting healthy volunteers who underwent complete eye examination and  
317 provided their blood sample for genetic analysis from the town of Korčula and the villages of  
318 Lumbarda, Žrnovo and Račišće. The Croatia-Split study included inhabitants of the Croatian  
319 coastal city of Split, aged 18 to 93. The sampling scheme was similar to Croatia- Korčula,  
320 and it took place during 2008 and 2009.

### 321 **Retinal Vascular Parameters Measurement**

#### 322 **Retinal image analysis**

#### 323 **Discovery cohorts**

324 Standard digital retinal photographs used for routine diabetic retinopathy screening were  
325 obtained from the clinical record in 2,104 participants in GoDARTS. Images of the right eye  
326 of usable quality, defined using criteria reported in[25,26], were selected and categorized into  
327 two datasets based on the image pixel resolution: GoDARTS dataset 1 (n=788) and  
328 GoDARTS dataset 2 (n=1288). Finally, 661 images from the GoDARTS dataset 1, and 1083  
329 images from GoDARTS dataset 2 were included after quality control (QC). 28 individual's  
330 images from the GoDARTS were excluded due to inadequate resolution. Standard fundus  
331 retinal photographs centred between the macula and optic disc were obtained using digital  
332 fundus camera from 1,743 participants in ORCADES. After image processing and QC, 1595  
333 individual's retinal images were used for this study.

334 VAMPIRE 3.0, was used to measure retinal vascular traits in fundus images from both  
335 GoDARTS and ORCADES. The measurement process is organized as a sequence of  
336 automatic and manual stages. Manual stages allowed correction of errors made by the  
337 automatic software (e.g. vessel labeling as artery or vein) and to minimize their impact on

338 statistical analysis. Standard protocols were followed to measure the retinal vessel  
339 parameters. Briefly, after automatic detection of the optic disc and its radius (*ODradius*), the  
340 6 thickest arterioles and 6 thickest venules appearing in a zone extending out from the optic  
341 disc boundary to 2 optic disc diameters were sampled to calculate the median (*TortA*) and  
342 maximum (*TortAmax*) arteriolar tortuosity and the median (*TortV*) and maximum (*TortVmax*)  
343 venular tortuosity. Central Retinal Artery and Vein Equivalent (*CRAE*, *CRVE*) and the  
344 Arteriole-to-Venule ratio (*AVR*) qualify vessel calibers and were measured in a zone 2 to 3  
345 optic disc radii from the center of the optic disc. Among the eight parameters, *TortA*,  
346 *TortAmax*, *TortV* and *TortVmax* mean values were normalized by natural log transformation  
347 for association analysis.

#### 348 **Replication Cohorts**

349 Standard retinal fundus images using digital fundus camera from 1091 individuals from  
350 LBC1936 were collected at the recruitment stage and three years later, retinal traits were  
351 measured at a subsequent wave of testing using SIVA v3.1[32,33] (Singapore I Vessels  
352 Assessment), at a mean age of 72.5 years (SD 0.7). A total of 897 and 976 individual's retinal  
353 fundus images centered between the macula and optic disc from Croatia- Korčula and  
354 Croatia-Split cohorts were collected using digital fundus camera and retinal traits were  
355 quantified using SIVA v3.1[32,33]. SIVA is a semi-automated software which can be used to  
356 measure the retinal vascular parameters including retinal vascular tortuosity and vascular  
357 caliber from retinal images. After automatic detection of the optic disc, it placed a grid with  
358 reference to the center of the optic disc. Then the tortuous vessels were identified and  
359 tortuosity traits including *TortA*, and *TortV* were measured using the standard grading  
360 protocol by the software; this process was monitored by trained graders and adjusted  
361 manually if necessary.



## 362 **Genotyping, quality control and imputation**

### 363 **Discovery cohorts**

364 GoDARTS samples were genotyped using the Affymetrix 6.0 (n=927) and Illumina Human  
365 Omni Express (n=809) platforms. The poor quality variants, samples were excluded based on  
366 the quality control (QC) criteria included the following: SNPs call rate < 95%, Hardy–  
367 Weinberg equilibrium (HWE) P value <  $10^{-6}$ , sample call rate < 95%, sample relatedness  
368 (IBD >0.8), and mismatch between reported and genotypic gender information. QC'd  
369 genotype data were imputed using IMPUTE2[47,48] on the basis of 1000 Genome Projects  
370 reference panel for all population. Finally, ancestry information of the individuals was  
371 derived using EIGENSTRAT[49] and first three principal components (PCs) were used for  
372 the association analyses to adjust the population stratification. ORCADES samples were  
373 genotyped with either the Illumina HumanHap300 bead chip (n=890) or the Illumina Omni1  
374 (n=304) or Illumina Omni Express bead chips (n=1073). Alleles were called in Bead  
375 Studio/Genome Studio (Hap300/Omni) using Illumina cluster files. Subjects were excluded if  
376 they fulfilled any of the following criteria: genotypic call rate <98%, mismatch between  
377 reported and genotypic sex, unexpectedly low genomic sharing with first or second degree  
378 relatives, excess autosomal heterozygosity, or outliers identified by IBS clustering analysis.  
379 We excluded SNPs on the basis of minor allele frequency (<0.01/monomorphism), HWE  
380 ( $P < 10^{-6}$ ), call rate (<97%). Given the very high overlap in SNPs between the two Omni chips,  
381 the intersection of QC'd SNPs was used to impute and phase individuals' genotyped on the  
382 Omni arrays together, whilst the Hap300 individuals were phased and imputed, separately.  
383 Samples were phased using Shapeit v2[50]. Imputation was carried out using IMPUTE2 and  
384 the 1,000 genomes reference panel. All ancestries phase1 integrated v3 reference panel, with  
385 a secondary reference panel of local exome sequences, sequenced using the Agilent Sure  
386 Select All Exon Kit v2.0 and Illumina 100 bp paired end reads (average 30x depth), derived

387 from 90 ORCADES subjects chosen to optimally represent the haplotypes present.  
388 Imputations for the Hap300 and Omni subjects were then combined to form a combined  
389 panel of 37.5m SNPs for 2222 subjects[51]. Imputed genotypes for 658, 1078, 1358  
390 individuals from the GoDARTS dataset 1, GoDARTS dataset 2 and ORCADES cohorts,  
391 respectively, were used for the three independent GWAS analysis.

## 392 **Replication Cohorts**

393 LBC1936 samples were genotyped at the Wellcome Trust Clinical Research Facility,  
394 Edinburgh, using the Illumina Human 610Quad BeadChip. Individuals were excluded based  
395 on unresolved gender discrepancy, relatedness, call rate ( $\leq 0.95$ ), and evidence of non-  
396 Caucasian descent. SNPs were included if they met the following conditions: call rate  $\geq 0.98$ ,  
397 minor allele frequency  $\geq 0.01$ , and Hardy-Weinberg equilibrium test with  $P \geq 0.001$ .  
398 Imputation to the 1000 Genomes (March 2012 release) reference set was performed using  
399 minimac software. A total of 1398 participants from the two independent Croatian replication  
400 cohorts were available for the analysis and subjects were genotyped on different genotyping  
401 platforms including Illumina CNV370v1 and CNV370-Quadv3 for Croatia-Korčula ( $n=378$ ),  
402 and Illumina CNV370-Quadv3 and IlluminaOmniExpressExome-8v1\_A for Croatia-Split  
403 ( $n=376$ ). Samples and markers were excluded based on the following QC metrics; SNPs call  
404 rate  $< 98\%$ , HWE with  $P$  value  $< 10^{-6}$ , sample call rate  $< 97\%$ , MAF  $< 1\%$ , outliers identified  
405 by IBS clustering analysis and unresolved gender discrepancy. Imputation was carried out  
406 using IMPUTE2 software and 1000G Phase I v3 (March 14, 2012) reference panel.

## 407 **Statistical analyses**

408 We performed association analyses with each data sets from GoDARTS separately for each  
409 of the eight retinal traits using SNPTEST V2.5[47], linear regression assuming an additive  
410 genetic model, adjusting for 3 ancestry PCs, age at eye examination and gender.

411 Subsequently, markers with low imputation quality scores ( $< 0.4$ ) and minor allele frequency  
412 cutoffs ( $< 0.03$ ) were filtered from each GWAS summary output data separately. Then we  
413 performed the meta-analysis using a fixed-effects model in GWAMA[52] with the QC  
414 filtered data sets. Association analysis in ORCADES was performed for each of the eight  
415 retinal traits, using linear mixed modelling to account for relatedness and assuming an  
416 additive genetic model, adjusting for 3 ancestry PCs, age at eye examination and gender,  
417 using MMscore in ProbABEL[53]. As in GoDARTS, markers with low imputation quality  
418 scores ( $< 0.4$ ) and minor allele frequency cutoffs ( $< 0.03$ ) were filtered and meta-analysis was  
419 performed with the GoDARTS and ORCADES results using GWAMA. The strand alignment  
420 and build check between studies were performed prior to meta-analysis. Also, the genomic  
421 inflation factor ( $\lambda$ ) was estimated by GWAMA ( $\lambda=0.99$ ). All statistical analyses and QCs  
422 were performed using SNPTEST v2.5[47], ProbABEL[53], GWAMA[52], PLINK v1.09[54],  
423 EIGENSTRAT[49], custom shell scripts, and R scripts. Manhattan plots, Quantile-Quantile  
424 plots and forest plots were generated using in-build R scripts, and metafor - R package[55].  
425 Regional plots were generated using the Locus Zoom tool[56] and other data processing was  
426 performed using R scripts. Conditional analyses were performed in SNPTEST v2.5 using the  
427 genome-wide associated loci in the *COL4A2* region, conditioned on lead SNPs (rs56399312).  
428 Also, this new locus was conditioned on previously reported genome-wide significant SNPs  
429 (rs4773144, rs11617955, rs9515203) associated with coronary artery disease (CAD).

#### 430 **Sensitivity analyses**

431 We performed an association test with an additive model adjusted for age, gender, and first  
432 three principal components in the diabetes cohort (GoDARTS) using 759 samples without  
433 any cardiovascular events prior to the retinal screening date.

#### 434 **Replication-analyses**

435 The top three SNPs ( $P \leq 1.07 \times 10^{-07}$ ) near *ACTN4*, *TMEM132D*, and *COL4A2* from the  
436 discovery stage for the tortuosity traits were taken forward for examination in three  
437 replication cohorts of European ancestry. In the LBC1936 cohort, association analysis was  
438 performed for arterial and venular tortuosity traits using linear regression model adjusting for  
439 age at eye examination, sex, and 3 ancestry PCs, using mach2qtl. Similarly, in the Croatia –  
440 Split, - Korčula cohorts, association analysis were performed for each traits separately using  
441 the mixed model in R - hglm package to account for kinship derived using gkin function of  
442 the GenABEL package[57].

443 Then we combined the summary association statistics for lead SNPs associated with *TortA*  
444 and *TortV* from the two discovery and three replication cohorts and effect estimates from  
445 each cohort were presented in the forest plots using metafor - R package. Due to the  
446 difference in the units of the beta and standard errors between the discovery and replication  
447 studies arising from different approaches to measurement we standardized the effect  
448 estimates (using Cohen's d) from each of the individual study cohort.

#### 449 **Power calculation**

450 The statistical power of detecting SNPs associations with the quantitative traits in two stage  
451 GWAS was calculated using the GWASPower/QT.

#### 452 ***In-silico* look-ups of the novel variants for clinical outcomes**

453 We performed *in-silico* look-ups of variants of interest for cardiovascular related outcomes  
454 including coronary artery disease, myocardial infarction, hypertension, HDL, and  
455 triglycerides from the CARDIoGRAMplus C4D consortium[20], GLGC [21] and the  
456 ICBPGWAS analysis[22]. The CARDIoGRAMplusC4D 1000 Genomes-based meta-analysis  
457 data comprised of 60,801 CAD cases and 123,504 controls from European, South Asian, and  
458 East Asian descent. In the GLGC, genetic data from 188,577 individuals of European, East

459 Asian, South Asian, and African ancestry were used to examine the genetic loci associated  
460 with blood lipids levels. The ICBP GWAS investigated the genetic loci associated with  
461 systolic and diastolic blood pressure traits in 200,000 individuals of European descent. We  
462 retrieved summary association results for the index SNPs from these studies to investigate the  
463 association of the lead SNPs for *TortA*, and *TortV* with cardiovascular outcomes.

464 A recent study reported the association of *ACTN4* locus with heart rate[44]. In order to  
465 examine whether the lead SNPs associated with *TortV* in *ACTN4* were also associated with  
466 heart rate, we checked the LD ( $r^2 > 0.8$ ) between our SNPs and the index SNP (rs11083475)  
467 for heart rate in that study. Furthermore, we investigated the association of these SNPs with  
468 pulse rate in the UK Biobank data. This data comprised of 112,008 participants who had a  
469 measure of pulse rate at the main interview and had genotype data. We extracted the imputed  
470 genotypes for these SNPs from the interim release data set of the UK Biobank[23] and  
471 performed multiple linear regressions including covariates of age, gender, and the first ten  
472 principal components obtained using EIGENSTRAT.

#### 473 ***In-silico* functional annotation**

474 The sentinel genome-wide significant variants were mapped to the gene, 20 kb  
475 upstream/downstream using BEDTools[58], and UCSC Genome Browser[59]. Top SNPs  
476 were queried in the HaploReg v4.1 database[60] to catalogue the all SNPs near noncoding  
477 variants with  $r^2 > 0.8$ , and RegulomeDB[61], and GWAS catalog databases[62] used to  
478 explore the known and predicted regulatory elements and relevant genetic association studies.  
479 Functional effects of the top genes were predicted using the Encyclopedia of DNA  
480 Elements[43] (ENCODE) project and Roadmap Epigenomics projects which aggregate the  
481 information about the transcription factor, motifs, histone modification, and chromatin states.  
482 Additionally, functional elements were investigated using HaploReg, UCSC Genome

483 Browser, and RegulomeDB. We used the expression Quantitative Trait Loci (eQTL) browser  
484 database in Genotype-Tissue Expression[41] (GTEx) to examine the cis-eQTLs for the top  
485 retinal traits associated SNPs mapped to the gene within the genomic region. Gene Visible  
486 web database from GENEINVESTIGATOR which integrates manually curated gene  
487 expression data from microarray and RNAseq experiments, was used to find the expression  
488 level of the genes, associated with tortuosity traits, in the human tissues.

## 489 **Acknowledgements**

490 We are grateful to all the participants in the GoDARTS study, the general practitioners, the  
491 Scottish School of Primary Care for their help in recruiting the participants, and to the whole  
492 team, which includes interviewers, computer and laboratory technicians, clerical workers,  
493 research scientists, volunteers, managers, receptionists, and nurses. The study complies with  
494 the Declaration of Helsinki. We acknowledge the support of the Health Informatics Centre,  
495 University of Dundee for managing and supplying the anonymized data and NHS Tayside,  
496 the original data owner. The Wellcome Trust United Kingdom Type 2 Diabetes Case Control  
497 Collection (GoDARTS) was funded by The Wellcome Trust (072960/Z/03/Z,  
498 084726/Z/08/Z, 084727/Z/08/Z, 085475/Z/08/Z, 085475/B/08/Z) and as part of the EU IMI-  
499 SUMMIT program.

500 ORCADES was supported by the Chief Scientist Office of the Scottish Government  
501 (CZB/4/276, CZB/4/710), the Royal Society, the MRC Human Genetics Unit, Arthritis  
502 Research UK and the European Union framework program 6 EUROSPAN project (contract  
503 no. LSHG-CT-2006-018947). DNA extractions were performed at the Wellcome Trust  
504 Clinical Research Facility in Edinburgh. We would like to acknowledge the invaluable  
505 contributions of the research nurses in Orkney, the administrative team in Edinburgh and the  
506 people of Orkney.

507 We thank the Lothian Birth Cohort 1936 (LBC1936) participants and team members who  
508 contributed to these studies. Phenotype collection was supported by Age UK (The  
509 Disconnected Mind project). Genotyping was funded by the BBSRC (BB/F019394/1). The  
510 work was undertaken by The University of Edinburgh Centre for Cognitive Ageing and  
511 Cognitive Epidemiology, part of the cross council Lifelong Health and Wellbeing Initiative  
512 (MR/K026992/1). Funding from the BBSRC and Medical Research Council (MRC) is  
513 gratefully acknowledged.

514 The Croatia- Korčula and Croatia-Split study were funded by grants from the Medical  
515 Research Council (UK), European Commission Framework 6 project EUROSPAN (Contract  
516 No. LSHG-CT-2006-018947), European Commission Framework 7 project BBMRI-LPC  
517 (FP7 313010), the Republic of Croatia Ministry of Science, Education and Sports research  
518 grant (216-1080315-0302) and the Croatian Science Foundation (grant 8875). We would like  
519 to acknowledge the staff of several institutions in Croatia that supported the field work,  
520 including but not limited to the University of Split and Zagreb Medical Schools and Croatian  
521 Institute for Public Health. The SNP genotyping for the Korčula cohort was performed in  
522 Helmholtz Zentrum München, Neuherberg, Germany.

523 VAMPIRE team: Parts of the VAMPIRE software and its use for measuring the image set  
524 described here was funded by the Leverhulme Trust project RPG-419 “Discovery of retinal  
525 biomarkers for genetics with large cross-linked data sets”. VAMPIRE 3.1 has been developed  
526 under funding from EPSRC (EPSRC EP/M005976/1), the EU (REVAMMAD ITN).

527 For the analysis of the association of the identified genetic variants with heart rate, this  
528 research has been conducted using the UK Biobank Resource under Application Number  
529 20405.

530

## 531 **References**

- 532 1. Flammer J, Konieczka K, Bruno RM, Virdis A, Flammer AJ, Taddei S. The eye and  
533 the heart. *Eur Heart J*. 2013;34(17):1270–8.
- 534 2. Liew G, Mitchell P, Rochtchina E, Wong TY, Hsu W, Lee ML, et al. Fractal analysis  
535 of retinal microvasculature and coronary heart disease mortality. *Eur Heart J*.  
536 2011;32(4):422–9.
- 537 3. Baker ML, Hand PJ, Wang JJ, Wong TY. Retinal signs and stroke: Revisiting the link  
538 between the eye and brain. *Stroke*. 2008;39(4):1371–9.
- 539 4. Ding J, Wai KL, McGeechan K, Ikram MK, Kawasaki R, Xie J, et al. Retinal vascular  
540 caliber and the development of hypertension: a meta-analysis of individual participant  
541 data. *J Hypertens*. 2014;32(2):207–15.
- 542 5. MacCormick IJ, Czanner G, Faragher B. Developing retinal biomarkers of  
543 neurological disease: an analytical perspective. *Biomark Med*. 2015;9(7):691–701.
- 544 6. Nägele MP, Barthelmes J, Ludovici V, Cantatore S, von Eckardstein A, Enseleit F, et  
545 al. Retinal microvascular dysfunction in heart failure. *Eur Heart J*.  
546 2017;(February):47–56.
- 547 7. Wang JJ, Liew G, Klein R, Rochtchina E, Knudtson MD, Klein BEK, et al. Retinal  
548 vessel diameter and cardiovascular mortality: Pooled data analysis from two older  
549 populations. *Eur Heart J*. 2007;28(16):1984–92.
- 550 8. Wang SB, Mitchell P, Liew G, Wong TY, Phan K, Thiagalingam A, et al. A spectrum  
551 of retinal vasculature measures and coronary artery disease. *Atherosclerosis* [Internet].  
552 Elsevier Ltd; 2018;268:215–24. Available from:  
553 <https://doi.org/10.1016/j.atherosclerosis.2017.10.008>



- 554 9. Poplin R, Varadarajan A V, Blumer K, Liu Y, McConnell M V, Corrado GS, et al.  
555 Prediction of cardiovascular risk factors from retinal fundus photographs via deep  
556 learning. *Nat Biomed Eng.* 2018;2(3):158–64.
- 557 10. Sun C, Zhu G, Wong TY, Hewitt AW, Ruddle JB, Hodgson L, et al. Quantitative  
558 genetic analysis of the retinal vascular caliber: The australian twins eye study.  
559 *Hypertension.* 2009;54(4):788–95.
- 560 11. Liu YP, Kuznetsova T, Jin Y, Thijs L, Asayama K, Gu YM, et al. Heritability of the  
561 retinal microcirculation in flemish families. *Am J Hypertens.* 2013;26(3):392–9.
- 562 12. Kamran Ikram M, Xueling S, Jensen RA, Cotch MF, Hewitt AW, Ikram MA, et al.  
563 Four novel loci (19q13, 6q24, 12q24, and 5q14) influence the microcirculation In vivo.  
564 *PLoS Genet.* 2010;6(10):1–12.
- 565 13. Sim X, Jensen RA, Ikram MK, Cotch MF, Li X, MacGregor S, et al. Genetic Loci for  
566 Retinal Arteriolar Microcirculation. *PLoS One.* 2013;8(6):1–12.
- 567 14. Jensen RA, Sim X, Smith AV, Cheng C, Brody JA, Cotch MF, et al. Novel Genetic  
568 Loci Associated with Retinal Microvascular Diameter. *Circ Cardiovasc Genet.*  
569 2016;9(1):45–54.
- 570 15. Macgregor S, Hewitt AW, Hysi PG, Ruddle JB, Medland SE, Henders AK, et al.  
571 Genome-wide association identifies ATOH7 as a major gene determining human optic  
572 disc size. *Hum Mol Genet.* 2010;19(13):2716–24.
- 573 16. Owen CG, Rudnicka AR, Nightingale CM, Mullen R, Barman SA, Sattar N, et al.  
574 Retinal arteriolar tortuosity and cardiovascular risk factors in a multi-ethnic population  
575 study of 10-year-old children; The child heart and health study in England (CHASE).  
576 *Arterioscler Thromb Vasc Biol.* 2011;31(8):1933–8.

- 577 17. Cheung CY-L, Zheng Y, Hsu W, Lee ML, Lau QP, Mitchell P, et al. Retinal vascular  
578 tortuosity, blood pressure, and cardiovascular risk factors. *Ophthalmology*. Elsevier  
579 Inc.; 2011;118(5):812–8.
- 580 18. Taarnhøj NCBB, Munch IC, Sander B, Kessel L, Hougaard JL, Kyvik K, et al. Straight  
581 versus tortuous retinal arteries in relation to blood pressure and genetics. *Br J*  
582 *Ophthalmol*. 2008;92:1055–60.
- 583 19. Kirin M, Nagy R, MacGillivray TJ, Polašek O, Hayward C, Rudan I, et al.  
584 Determinants of retinal microvascular features and their relationships in two European  
585 populations. *J Hypertens*. Lippincott Williams & Wilkins; 2017 Aug 13;35(8):1646–  
586 59.
- 587 20. Nikpay M, Goel A, Won H-H, Hall LM, Willenborg C, Kanoni S, et al. A  
588 comprehensive 1000 Genomes-based genome-wide association meta-analysis of  
589 coronary artery disease. *Nat Genet*. 2015 Oct 7;47(10):1121–30.
- 590 21. Willer CJ, Schmidt EM, Sengupta S, Peloso GM, Gustafsson S, Kanoni S, et al.  
591 Discovery and refinement of loci associated with lipid levels. *Nat Genet*.  
592 2013;45(11):1274–83.
- 593 22. Ehret GB, Munroe PB, Rice KM, Bochud M, Johnson AD, Chasman DI, et al. Genetic  
594 Variants in Novel Pathways Influence Blood Pressure and Cardiovascular Disease  
595 Risk. *Nature*. 2011 Oct 6;478(7367):103–9.
- 596 23. Sudlow C, Gallacher J, Allen N, Beral V, Burton P, Danesh J, et al. UK Biobank: An  
597 Open Access Resource for Identifying the Causes of a Wide Range of Complex  
598 Diseases of Middle and Old Age. *PLoS Med*. 2015;12(3):1–10.
- 599 24. Trucco E, Giachetti A, Ballerini L, Relan D, Cavinato A, MacGillivray T.

- 600 Morphometric measurements of the retinal vasculature in fundus images with  
601 VAMPIRE. *Biomed Image Underst Methods Appl.* 2015;91–111.
- 602 25. MacGillivray TJ, Cameron JR, Zhang Q, El-Medany A, Mulholland C, Sheng Z, et al.  
603 Suitability of UK Biobank retinal images for automatic analysis of morphometric  
604 properties of the vasculature. *PLoS One.* 2015;10(5):1–10.
- 605 26. Giachetti A, Trucco E. Accurate and reliable segmentation of the optic disc in digital  
606 fundus images the optic disc in digital fundus images. *J Med Imaging.* 2014;1(2).
- 607 27. Lupaşcu CA, Tegolo D, Trucco E. Accurate estimation of retinal vessel width using  
608 bagged decision trees and an extended multiresolution Hermite model. *Med Image*  
609 *Anal.* 2013;17(8):1164–80.
- 610 28. Ramdas WD, van Koolwijk LME, Ikram MK, Jansonius NM, de Jong PTVM, Bergen  
611 AAB, et al. A genome-wide association study of optic disc parameters. *PLoS Genet.*  
612 2010;6(6):1–12.
- 613 29. Khor CC, Ramdas WD, Vithana EN, Cornes BK, Sim X, Tay WT, et al. Genome-wide  
614 association studies in Asians confirm the involvement of ATOH7 and TGFBR3, and  
615 further identify CARD10 as a novel locus influencing optic disc area. *Hum Mol Genet.*  
616 2011;20(9):1864–72.
- 617 30. Springelkamp H, Mishra A, Hysi PG, Gharahkhani P, Höhn R, Khor C-C, et al. Meta-  
618 analysis of Genome-Wide Association Studies Identifies Novel Loci Associated With  
619 Optic Disc Morphology. *Genet Epidemiol.* 2015 Mar 28;39(3):207–16.
- 620 31. Deary IJ, Gow AJ, Pattie A, Starr JM. Cohort profile: The lothian birth cohorts of 1921  
621 and 1936. *Int J Epidemiol.* 2012;41(6):1576–84.
- 622 32. Sasongko MB, Wang JJ, Donaghue KC, Cheung N, Benitez-Aguirre P, Jenkins A, et

- 623 al. Alterations in retinal microvascular geometry in young type 1 diabetes. *Diabetes*  
624 *Care*. 2010;33(6):1331–6.
- 625 33. Koh V, Cheung CYL, Zheng Y, Wong TY, Wong W, Aung T. Relationship of retinal  
626 vascular tortuosity with the neuroretinal rim: The singapore malay eye study. *Investig*  
627 *Ophthalmol Vis Sci*. 2010;51(7):3736–41.
- 628 34. Kuo DS, Labelle-Dumais C, Gould DB. Col4a1 and col4a2 mutations and disease:  
629 Insights into pathogenic mechanisms and potential therapeutic targets. *Hum Mol*  
630 *Genet*. 2012;21(R1).
- 631 35. Odonnell CJ, Kavousi M, Smith A V., Kardia SLR, Feitosa MF, Hwang SJ, et al.  
632 Genome-wide association study for coronary artery calcification with follow-up in  
633 myocardial infarction. *Circulation*. 2011;124(25):2855–64.
- 634 36. Tarasov K V. COL4A1 Is Associated With Arterial Stiffness By Genome Wide  
635 Association Scan. 2009;2(2):151–8.
- 636 37. Schunkert H, Konig IR, Kathiresan S, Reilly MP, Assimes TL, Holm H, et al. Large-  
637 scale association analysis identifies 13 new susceptibility loci for coronary artery  
638 disease. *Nat Genet*. 2011;43(4):333–8.
- 639 38. Yang W, Ng FL, Chan K, Pu X, Poston RN, Ren M, et al. Coronary-Heart-Disease-  
640 Associated Genetic Variant at the COL4A1/COL4A2 Locus Affects  
641 COL4A1/COL4A2 Expression, Vascular Cell Survival, Atherosclerotic Plaque  
642 Stability and Risk of Myocardial Infarction. *PLoS Genet*. 2016;12(7):1–15.
- 643 39. Deloukas P, Kanoni S, Willenborg C, Farrall M, Assimes TL, Thompson JR, et al.  
644 Large-scale association analysis identifies new risk loci for coronary artery disease.  
645 *Nat Genet*. 2013;45(1):25–33.

- 646 40. Su AI, Wiltshire T, Batalov S, Lapp H, Ching K a, Block D, et al. A gene atlas of the  
647 mouse and human protein-encoding transcriptomes. *Proc Natl Acad Sci U S A*.  
648 2004;101(16):6062–7.
- 649 41. Ardlie KG, Deluca DS, Segre A V., Sullivan TJ, Young TR, Gelfand ET, et al. The  
650 Genotype-Tissue Expression (GTEx) pilot analysis: Multitissue gene regulation in  
651 humans. *Science (80- )*. 2015;348(6235):648–60.
- 652 42. Chiu C, Bagnall RD, Ingles J, Yeates L, Kennerson M, Donald J a., et al. Mutations in  
653 Alpha-Actinin-2 Cause Hypertrophic Cardiomyopathy. A Genome-Wide Analysis. *J*  
654 *Am Coll Cardiol*. Elsevier Inc.; 2010;55(11):1127–35.
- 655 43. Myers RM, Stamatoyannopoulos J, Snyder M, Dunham I, Hardison RC, Bernstein BE,  
656 et al. A user’s guide to the Encyclopedia of DNA elements (ENCODE). *PLoS Biol*.  
657 2011;9(4).
- 658 44. den Hoed M, Eijgelsheim M, Esko T, Brundel BJJM, Peal DS, Evans DM, et al.  
659 Identification of heart rate-associated loci and their effects on cardiac conduction and  
660 rhythm disorders. *Nat Genet*. 2013;45(6):621–31.
- 661 45. Hébert HL, Shepherd B, Milburn K, Veluchamy A, Meng W, Carr F, et al. Cohort  
662 Profile: Genetics of Diabetes Audit and Research in Tayside Scotland (GoDARTS). *Int*  
663 *J Epidemiol*. 2017;(December):1–12.
- 664 46. McQuillan R, Leutenegger AL, Abdel-Rahman R, Franklin CS, Pericic M, Barac-Lauc  
665 L, et al. Runs of Homozygosity in European Populations. *Am J Hum Genet*.  
666 2008;83(3):359–72.
- 667 47. Marchini J, Howie B. Genotype imputation for genome-wide association studies. *Nat*  
668 *Rev Genet*. Nature Publishing Group; 2010;11(7):499–511.

- 669 48. Howie B, Marchini J, Stephens M. Genotype Imputation with Thousands of Genomes.  
670 G3. 2011;1(6):457–70.
- 671 49. Price AL, Patterson NJ, Plenge RM, Weinblatt ME, Shadick N a, Reich D. Principal  
672 components analysis corrects for stratification in genome-wide association studies. Nat  
673 Genet. 2006;38(8):904–9.
- 674 50. O’Connell J, Gurdasani D, Delaneau O, Pirastu N, Ulivi S, Cocca M, et al. A General  
675 Approach for Haplotype Phasing across the Full Spectrum of Relatedness. PLoS  
676 Genet. 2014;10(4).
- 677 51. Joshi PK, Prendergast J, Fraser RM, Huffman JE, Vitart V, Hayward C, et al. Local  
678 Exome Sequences Facilitate Imputation of Less Common Variants and Increase Power  
679 of Genome Wide Association Studies. PLoS One. 2013;8(7).
- 680 52. Magi R, Morris AP. GWAMA: software for genome-wide association meta-analysis.  
681 BMC Bioinformatics. 2010;11(ii):288.
- 682 53. Karssen L, Kooyman M, Aulchenko Y, Struchalin M. ProbABEL. 2016;1–24.
- 683 54. Chang CC, Chow CC, Tellier LC, Vattikuti S, Purcell SM, Lee JJ, et al. Second-  
684 generation PLINK: rising to the challenge of larger and richer datasets. Gigascience.  
685 2015;4(1):7.
- 686 55. Team RC. R: A language and environment for statistical computing. R Found Stat  
687 Comput Vienna, Austria. 2014;
- 688 56. Pruim RJ, Welch RP, Sanna S, Teslovich TM, Chines PS, Gliedt TP, et al.  
689 LocusZoom: Regional visualization of genome-wide association scan results.  
690 Bioinformatics. 2011;27(13):2336–7.
- 691 57. Aulchenko YS, Ripke S, Isaacs A, van Duijn CM. GenABEL: An R library for

- 692 genome-wide association analysis. *Bioinformatics*. 2007;23(10):1294–6.
- 693 58. Quinlan AR. BEDTools: The Swiss-Army tool for genome feature analysis. *Current*  
694 *Protocols in Bioinformatics*. 2014. 11.12.1-11.12.34 p.
- 695 59. Speir ML, Zweig AS, Rosenbloom KR, Raney BJ, Paten B, Nejad P, et al. The UCSC  
696 Genome Browser database: 2016 update. *Nucleic Acids Res*. 2015;44(D1):D717–25.
- 697 60. Ward LD, Kellis M. HaploReg: A resource for exploring chromatin states,  
698 conservation, and regulatory motif alterations within sets of genetically linked variants.  
699 *Nucleic Acids Res*. 2012;40(D1):1–5.
- 700 61. Boyle AP, Hong EL, Hariharan M, Cheng Y, Schaub M a., Kasowski M, et al.  
701 Annotation of functional variation in personal genomes using RegulomeDB. *Genome*  
702 *Res*. 2012;22(9):1790–7.
- 703 62. Welter D, MacArthur J, Morales J, Burdett T, Hall P, Junkins H, et al. The NHGRI  
704 GWAS Catalog, a curated resource of SNP-trait associations. *Nucleic Acids Res*.  
705 2014;42(D1):1001–6.

706

## 707 **Supporting Information**

- 708 **S1 Fig. Retinal fundus image.** Solid lines (red for arterioles and dark blue for venules)  
709 represent the vessels detected automatically and measured by VAMPIRE (Vasculature  
710 Assessment and Measurement Platform for Images of the REtina) software (version 3.0,  
711 Universities of Edinburgh and Dundee, UK). Dotted lines (light blue) represent the  
712 measurement zones on a fundus image; based on optic disc (light blue circle) location and  
713 radius.
- 714 **S2 Fig.** Meta-analysis on genome-wide association results from two independent discovery  
715 cohorts. Manhattan plots for six quantitative retinal traits. A. represents the results from Optic  
716 Disc Radius (*ODradius*), B. represents the results from retinal arteriolar tortuosity maximum

717 (*TortAmax*), C. represents the results from retinal venular tortuosity (*TortVmax*), D.  
718 represents the results from Central Retinal Arteriolar Equivalent (*CRAE*), E. represents the  
719 results from Central Retinal Venular Equivalent (*CRVE*), and F. represents the results from  
720 Arteriole-to-Venule ratio (*AVR*). The blue and red horizontal lines indicate the suggestive and  
721 genome-wide significance threshold ( $P < 5 \times 10^{-8}$ ), respectively.

722 **S3 Fig.** Quantile-quantile plots of GoDARTS-ORCADES meta-analysis for eight quantitative  
723 retinal blood vessel traits. Shaded areas represent 95% confidence intervals. Naturally log  
724 transformed -TortA: retinal arteriolar tortuosity, TortAmax: maximum retinal arteriolar  
725 tortuosity, TortV: retinal venular tortuosity, TortVmax: maximum retinal arteriolar tortuosity.  
726 ODradius: Optic Disc Radius, CRAE: Central Retinal Arteriolar Equivalent, CRVE: Central  
727 Retinal Venular Equivalent, AVR: Arteriole-to-Venule ratio.

728 **S4 Fig.** Regional association plots of index SNP reached  $p$ -value  $< 5 \times 10^{-7}$  in the meta-  
729 analysis of the two discovery study cohorts (GoDARTS and ORCADES). a) *TortA* b)  
730 maximum *TortA* c-d) *TortV* e) *ODradius* f) maximum *TortV*.

731 **S5 Fig.** Box plots represent the expression level of genes associated with retinal blood vessel  
732 traits. a) *COL4A2* b) *COL4A1* c) *ACTN4* d) *CAPN12*. These plots were created using  
733 GENEVESTIGATOR which integrates manually curated gene expression data from  
734 microarray and RNAseq experiments. Blue lines at the bottom of the box indicates the gene  
735 expression level across 451 tissues in human. Y-axis depicts the top ten tissues and the  
736 sample size shown in secondary Y-axis. Colour scale (Low to High) at the top depicts the  
737 gene expression range in log<sub>2</sub>scale.

738 **S6 Fig.** eQTL annotation of top GWAS variants for quantitative retinal vessel traits. Y-axis  
739 represents tissue-specific gene expression data which is normalized by rank normalization  
740 method while x-axis shows the GWAS lead variant genotypes. a) TortA associated SNP,  
741 rs7991229 is correlated with *COL4A2* expression in heart left ventricle; b) TortA associated  
742 SNP, rs9515212 is correlated with *COL4A2* expression in heart left ventricle tissue; c) TortV  
743 associated SNP, rs1808382 is correlated with *CAPN12* expression in artery aorta; d) TortV  
744 associated SNP, rs1808382 is correlated with *ACTN4* expression in artery aorta.

745 **S7 Fig.** Conditional analysis of the genome-wide significant variant (rs56399312) at *COL4A2*  
746 locus. Locus zoom plots for the *COL4A2* locus associated region (GoDARTS) conditioned on  
747 the CAD associated SNPs (rs11617955, rs4773144, rs9515203) reported previously in the



748 GWAS study. a) Top SNP (TortA) Conditioned on rs11617955, b) Top SNP (TortA)  
749 Conditioned on rs4773144 c) Top SNP (TortA) Conditioned on rs9515203.

750 **S8 Fig.** Multi-tissue eQTL comparison for TortV associated SNP, rs1808382 is correlated  
751 with a) *ACTN4* expression and b) *CAPN12* expression.

752 **S9 Fig.** Locus zoom plot for the *ACTN4* locus associated with TortV also associated with  
753 pulse rate in UK Biobank. The lead SNP, rs1808382 associated with TortV (Discovery and  
754 replication stage) in that region is indicated by purple colour solid diamond.

755

756 **S1 Table.** Significant SNPs for each quantitative retinal vascular traits that reached  $P < 7 \times 10^{-7}$  in  
757 the meta-analysis of discovery cohorts.

758 **S2 Table.** SNPs in *COL4A2* conditioned on top SNP rs56399312 (discovery cohorts), associated  
759 with *TortA*. TortA, retinal arteriolar tortuosity.

760 **S3 Table.** Summary of previously reported significant SNPs associated with Optic Disc area,  
761 CRAE, and CRVE look-ups in GoDARTS-ORCADES meta-analysis study.

762 **S4 Table.** *In silico* functional annotation of significant SNPs for quantitative retinal vascular  
763 traits.

764 **S5 Table.** Significant top hits that reached  $P < 1 \times 10^{-7}$  for quantitative retinal vascular traits as  
765 eQTLs (GTEx) in different tissues.

766 **S6 Table.** Top SNPs in *COL4A2* associated with TortA conditioned on reported coronary artery  
767 disease SNPs.

768 **S7 Table.** Summary of significant SNPs ( $P < 8 \times 10^{-07}$ ) associated with tortuosity traits from  
769 discovery stage, replicated in myocardial infarction (MI) and coronary artery disease (CAD)  
770 GWAS.

771 **S8 Table.** Summary of previously reported significant SNPs associated with coronary artery  
772 disease (CARDioGramplus C4D) look-ups in GoDARTS-ORCADES meta-analysis study for  
773 retinal arteriolar tortuosity trait.

774 **S9 Table.** Genome-wide significant SNPs ( $P < 8 \times 10^{-07}$ ) for retinal tortuosity traits from discovery  
775 stage, are associated with different traits (Type2Diabetes Knowledge Portal and ICBP).

776 **S10 Table.** Sensitivity analyses using GoDARTS (diabetes).

777 **S11 Table.** Lead SNPs associated with TortV are also associated with heart rate in UK Biobank.

778

## 779 **Author Contributions**

780 The study was designed by C.NA.P, A.SF.D, and E.T for GoDARTS cohort, J.F.W for  
781 ORCADES cohort, I.J.D for LBC1936 cohort, O.P for Croatia-Split, and Croatia-Korcula  
782 cohort. VAMPIRE software was designed and developed by E.T, T.M, D.R, E.B, S.K.V, and  
783 B.D. Retinal images were collected and analysis was performed by E.T, T.M, J.F.W, L.B,  
784 M.K, D.R, V.V, and H.C. Genotype data processing and statistical analysis was conducted by  
785 A.V, K.E.S, P.K.J, L.B, M.K, S.H, V.V, C.H and K.Z. Bioinformatics analysis was  
786 performed by A.V. The manuscript was drafted by A.V, C.NA.P A.SF.D, and revised by E.T,  
787 J.F.W, T.M, I.J.D, S.H, E.R.P and K.Z. All the authors reviewed the manuscript.

## 788 **Figure Legends**

789 **Fig 1. Study Design.** GoDARTS: Genetics of Diabetes Audit and Research in Tayside;  
790 ORCADES: Orkney Complex Disease Study; LBC1936: Lothian Birth Cohorts 1936; All  
791 Croatia: Croatia island of Korcula, Croatia Split; *ODradius*: Optic Disc Radius, *CRAE*:  
792 Central Retinal Arteriolar Equivalent, *CRVE*: Central Retinal Venular Equivalent, *AVR*:  
793 Arteriole-to-Venule ratio, Natural log transformed data – *TortA*: retinal arteriolar tortuosity,  
794 *TortAmax*: maximum retinal arteriolar tortuosity, *TortV*: retinal venular tortuosity, *TortVmax*:  
795 maximum retinal arteriolar tortuosity; PC: Principal Components;  $u$  is the genetic value for  
796 each subject under a random effects model, covariance amongst subjects assumed to be  
797 proportionate to the genomic relationship matrix.

798 **Fig 2. Manhattan plots for meta-analysis of genome-wide association results from two**  
799 **independent discovery cohorts.** A, represents the results for the arteriolar tortuosity (*TortA*)  
800 and B. represents the results for the venular tortuosity trait (*TortV*). The blue and red  
801 horizontal lines indicate the suggestive and genome-wide significance threshold ( $P < 5 \times 10^{-8}$ ),  
802 respectively.

803

804 **Fig 3. Regional association and recombination plots of variants that reached genome-**  
805 **wide significance in overall meta-analysis (discovery and replication stage).** A-B, Top  
806 hits for *TortA* and C-D, Top hits for *TortV*. Each plot was created using LocusZoom for the  
807 lead SNP in genomic region 400 kb in either side of the significant signal. Blue spikes

808 represents the estimated recombination rates. Colour scale (high to low  $r^2$ ) circles depicts the  
809 pairwise correlation ( $r^2$ ) between lead SNP and other SNPs in the loci. The lead SNP in that  
810 region is indicated by purple colour solid diamond and gene annotations in this region is  
811 shown in the bottom panels.

812 **Fig 4. Forest Plots for the genome-wide significant hits (overall meta-analysis)**  
813 **associated with arteriolar (A. rs7991229) and venular tortuosity traits (B. rs1808382).**

814 The plots represent standardized beta and standard error from GoDARTS, ORCADES,  
815 LBC1936, Croatia KORCULA-SPLIT, and meta-analysis study. Standardized beta estimate:  
816 Change in natural log transformed retinal tortuosity traits for each copy of the effect allele.  
817 Due to the difference in the units of the beta and standard errors between the discovery and  
818 replication studies arising from different approaches to measurement, we standardized the  
819 effect estimates from each individual's study results.



**Study cohort 1: GoDARTS**

GWAS meta-analysis for 8 traits  
( $\ln(\text{TortA})$ ,  $\ln(\text{max TortA})$ ,  $\ln(\text{TortV})$ ,  $\ln(\text{max TortV})$ ,  
ODradius, CRAE, CRVE, AVR – quantitative retinal  
blood vessel traits)

Linear regression – additive model

**trait ~ SNP + sex + age + 3 PCs**

(GoDARTS dataset 1 sample size = 658;  
GoDARTS dataset 2 sample size = 1078)

**Study cohort 2: ORCADES**

GWAS for 8 traits  
( $\ln(\text{TortA})$ ,  $\ln(\text{max TortA})$ ,  $\ln(\text{TortV})$ ,  $\ln(\text{max TortV})$ ,  
ODradius, CRAE, CRVE, AVR – quantitative retinal  
blood vessel traits)

Mixed linear model – additive model

**trait ~ SNP + sex + age + 3 PCs + Zu**

sample size = 1358

Stage 1 (discovery cohorts)

**Meta-analysis: GoDARTS & ORCADES**

Fixed effect meta-analysis of two independent discovery  
stage results for 8 traits  
sample size = 3094

Stage 2 (replication cohorts)

**Replication : LBC1936, Croatia-Korcula, Croatia-Split**

Replication of genome-wide significant loci for both  
 $\ln(\text{TortA})$ , and  $\ln(\text{TortV})$  in 3 independent cohorts  
Sample Size = 1413

Overall meta-analysis : tortuosity traits

$P \leq 1.07E^{-07}$

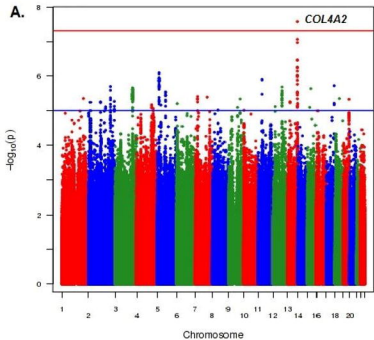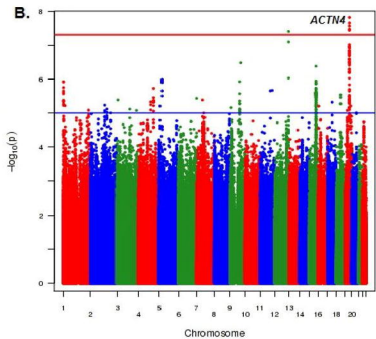

Plotted SNPs

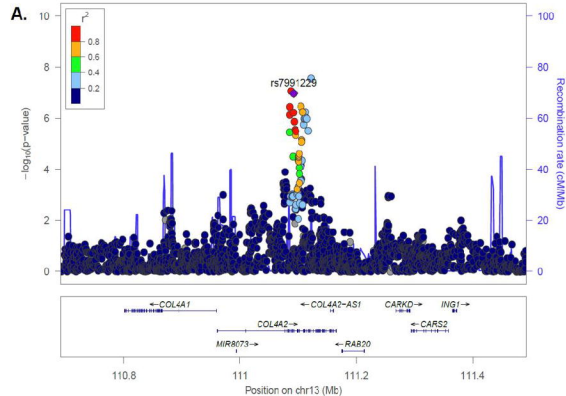

Plotted SNPs

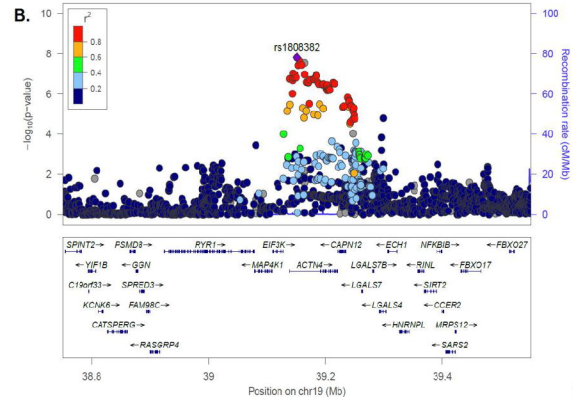



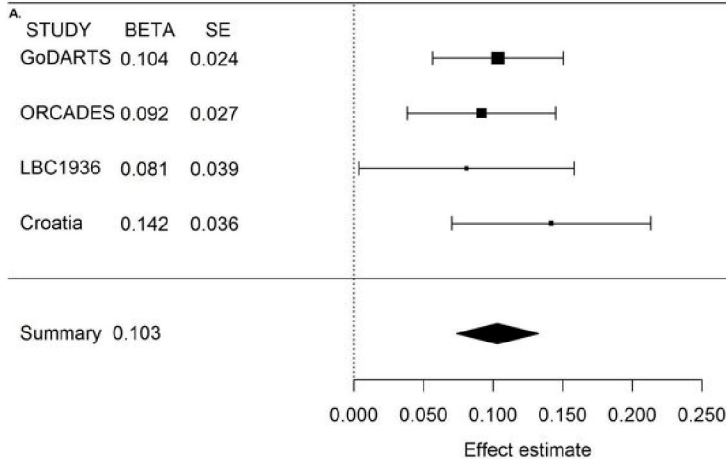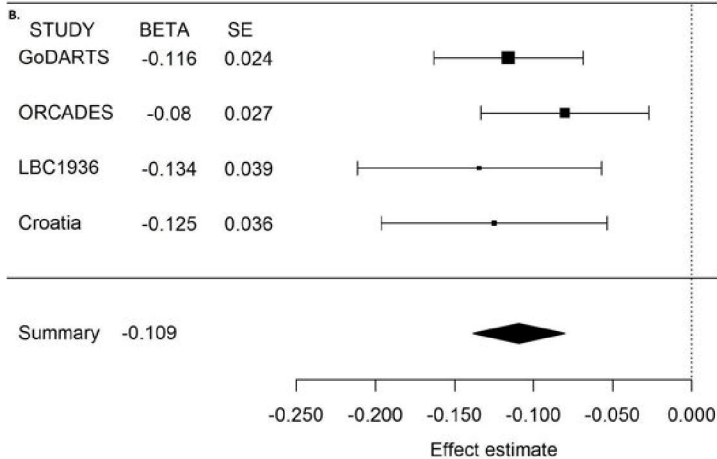

Source: http://biorxiv.org/content/10.1101/121012v2.full.pdf
